# Supplementary material for: Refinement in the European Union: A Systematic Review
Source: MDPI journal article supplement (doi:10.3390/ani12233263), 2022-11-23
Supplement: s1 [file s1]

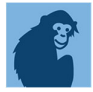

| Country        | Financial support |    |          |               |                    |
|----------------|-------------------|----|----------|---------------|--------------------|
|                | No-funding        | EU | National | Institutional | Private Foundation |
| Austria        | 3                 |    |          |               |                    |
| Belgium        | 1                 | 1  |          |               |                    |
| Czech Republic |                   | 1  | 1        |               |                    |
| Denmark        | 1                 | 1  | 1        |               | 1                  |
| France         |                   | 1  | 2        | 1             |                    |
| Germany        | 5                 | 1  | 7        | 4             | 1                  |
| Hungary        |                   | 1  |          |               |                    |
| Italy          |                   | 1  | 1        |               |                    |
| Norway         |                   | 1  |          |               |                    |
| Spain          | 3                 |    |          |               |                    |
| Sweden         | 2                 | 1  |          |               | 1                  |
| United Kingdom | 3                 | 4  | 16       | 2             |                    |
